# Supplementary material for: Characterization of Multiple Cytokine Combinations and TGF-β on Differentiation and Functions of Myeloid-Derived Suppressor Cells
Source: MDPI journal article supplement (doi:10.3390/ijms19030869), 2018-03-15
Supplement: s1 [file s1]

# Characterization of multiple cytokine combinations and TGF- $\beta$ on differentiation and functions of myeloid-derived suppressor cells

Cho-Rong Lee<sup>†</sup>, Wongeun Lee<sup>†</sup>, Steve K. Cho and Sung-Gyoo Park\*

School of Life Sciences, Gwangju Institute of Science and Technology (GIST),  
Gwangju 61005, Republic of Korea

\*Correspondence: sgpark@gist.ac.kr; Tel.: +82-62-715-2511

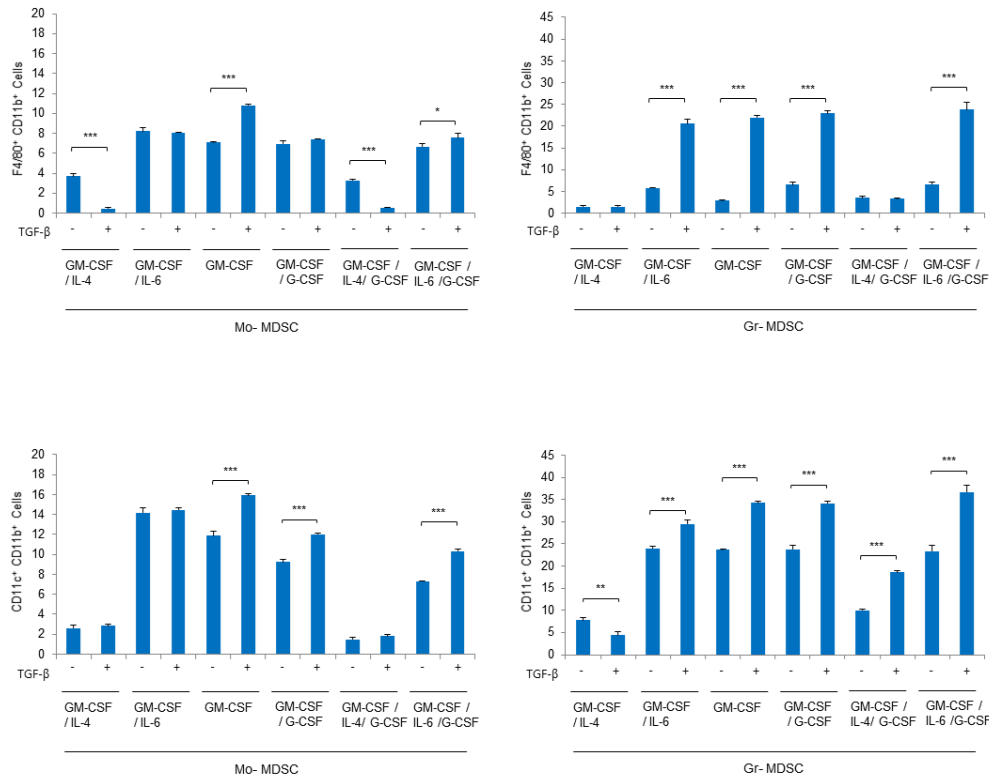

**Supplementary Figure 1.** Mature marker expression of the generated MDSCs. Summary of flow cytometry analysis of F4/80 (a marker of mature macrophages) and CD11c (a marker of mature dendritic cells) expression by bone marrow-derived MDSCs differentiated in the presence/absence of TGF- $\beta$ . Data are representative of three independent experiments in triplicate, and the results are expressed as the mean  $\pm$  SD. \*p < 0.05, \*\*p < 0.01, \*\*\*p < 0.001 (Student's t test).
